# Supplementary material
Source: MDPI journal article supplement (https://www.mdpi.com/2073-4395/12/7/1700)
Supplement: s1 [file s1 › agronomy-1801040-SI.pdf]

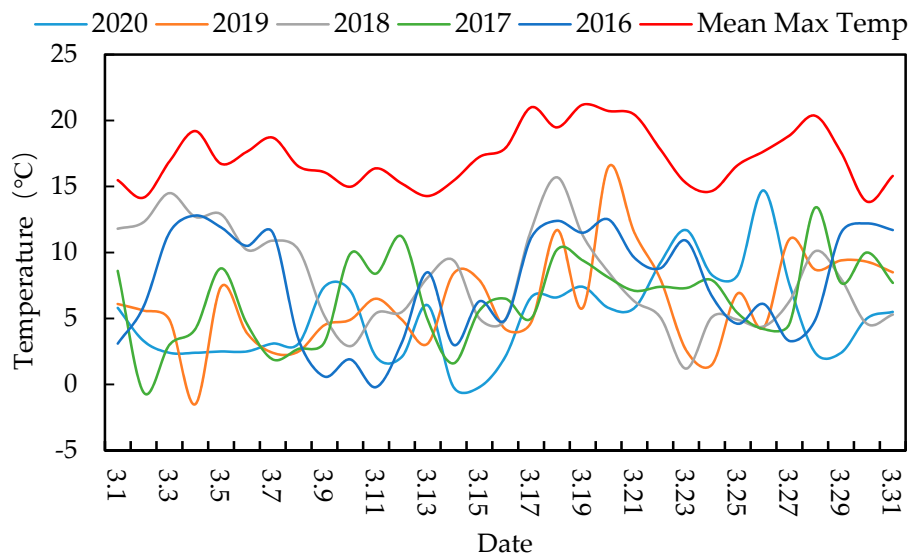

**Figure S1.** Daily minimum temperature in March from 2016 to 2020 and daily average maximum temperature in March of these five years in Hefei.

These suggest that the daily minimum temperature is close to 0 °C in March every year from 2016 to 2020. The temperature reached a low value on 14 to 15 March 2016, 2017 and 2020, in which the temperature below 0 °C (−0.2 °C) occurred for two consecutive days in 2016. The minimum temperature on 23 March 2018 is 1.2 °C, and the minimum temperature on 4 March and 23 March 2019 is −1.2 °C and 1.5 °C, respectively. Furthermore, the average maximum temperature of each day in March from 2016 to 2020 is basically 15 to 20 °C. Due to the rapid cooling and large day-night temperature difference, wheat spikes entered anther differentiation period around the middle of March every year, which were very prone to chilling and freezing injury. Abbreviations: Temp = temperature. Data sources: Meteomanz.com.
